# Supplementary material
Source: Frontiers journal article supplement (https://www.frontiersin.org/articles/377404)
Supplement: Data_Sheet_4.PDF [file Data_Sheet_4.PDF]

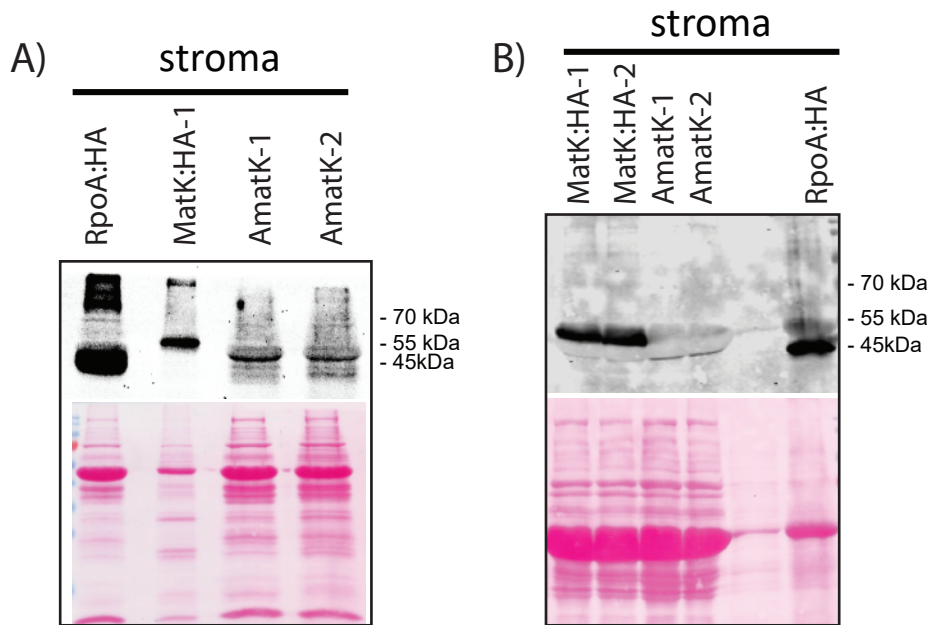

Supplemental Figure 4: Immunological analysis of MatK:HA in Amatak lines. In these experiments, a signal distinct in size from MatK:HA control lines can be seen slightly above 45 kDa (as in the blot shown in Fig. 4). This is a replicate of the experiment shown in figure 4, with the following differences: A) An anti-HA antibody from mouse was used (Sigma-Aldrich) for detection B) nitrocellulose (Whatman NC20, GE Healthcare, Chalfont St. Giles, GB) was used as a blotting membrane and 0.1% SDS was added to the transfer buffer. The IRDye 800CW goat anti mouse antibody (Li-Cor, Lincoln, USA) was used as a secondary antibody. Detection was done with Odyssey CLx Imaging system (LI-Cor, Lincoln, USA).
